# Supplementary material for: IRF3 promotes adipose inflammation and insulin resistance and represses browning
Source: JCI journal article supplement (doi:10.1172/jci86080), 2016-07-10

## **Supplemental data**

### **TABLE OF CONTENTS**

|           |                                   |           |
|-----------|-----------------------------------|-----------|
| <b>1.</b> | Supplemental Figure Legends ..... | <b>2</b>  |
| <b>2.</b> | Supplemental Table Legends .....  | <b>6</b>  |
| <b>3.</b> | Supplemental Figures .....        | <b>7</b>  |
| <b>4.</b> | Supplemental Tables .....         | <b>17</b> |

## 1. Supplemental Figure legends

### Supplemental Figure 1. Expression of macrophage markers in SVF from HFD mice.

(A) Expression of macrophage marker genes in isolated stromal-vascular fraction (SVF) of adipose tissue (eWAT and iWAT) from chow and HFD fed mice by qPCR. (B) SVF isolated from eWAT and iWAT of chow and HFD fed mice were gated for live CD45<sup>+</sup> cells. Representative scatter-plot showing macrophages stained with F4/80 and CD11b antibody. (C and D) Expression of *Irf3* and macrophage marker genes in sorted F4/80<sup>+</sup> CD11b<sup>+</sup> macrophages by FACS. n=5-6/group. Data is presented as mean ± SEM. For all data, \**p*<0.05.

### Supplemental Figure 2. Effect of LPS, palmitate and poly I:C treatment in the absence or presence of IRF3.

(A) Expression of mouse IRF3 at mRNA and protein level in mature 3T3-L1 adipocytes transduced with lentivirus expressing shRNA against mouse *Irf3*, determined by qPCR and Western blotting. n=4. (B) Western blot showing effect of LPS treatment on protein levels of p65 and phospho-p65 in isolated nuclei and/or cytosolic fraction of 3T3-L1 adipocytes. (C) Effect of LPS (700 ng/ml) treatment for 6 days on NF-κB activity in the isolated nuclei fraction from 3T3-L1 adipocytes using TransAm NF-κB activity kit. Lysate from Raw 264.7 cells treated with LPS (700 ng/ml) for 1 h was used as a positive control. (D) Basal and insulin-stimulated glucose uptake in 3T3-L1 adipocytes after treatment with varying doses of palmitate for 48 h. (E) Basal and insulin-stimulated glucose uptake in 3T3-L1 adipocytes transduced with lentivirus expressing shRNA against *Irf3* or shLuc control hairpin in the absence or presence of palmitate treatment (1 mM). (F) Western blot showing effect of poly I:C treatment on protein levels of p65 and phospho-p65 in isolated nuclei and/or cytosolic fraction of 3T3-L1 adipocytes. Data is presented as mean ± SEM. \*\*\**p*<0.001, \*\**p*<0.01, \**p*<0.05.

**Supplemental Figure 3. Effect of IRF3 overexpression on insulin signaling in 3T3-L1 adipocytes.**

(A) Schematic representation of the wild-type IRF3 and mutant IRF3 (IRF3-2D) protein. (B) Overexpression of mouse IRF3 and IRF3-2D mutant at mRNA and protein level in mature 3T3-L1 adipocytes transduced with lentivirus, determined by qPCR and Western blotting. n=4. (C) Effect of IRF3 overexpression on inflammatory gene expression by lentivirus transduction in mature 3T3-L1 adipocytes using qPCR. n=4. (D) Effect of IRF3 overexpression on insulin signaling in mature 3T3-L1 adipocytes by Western blotting. Data is presented as mean  $\pm$  SEM. \* $p$ <0.05, \*\*\* $p$ <0.001.

**Supplemental Figure 4. Differentially regulated genes by IRF3 overexpression or knockdown in the absence or presence of LPS.**

(A) Heat map showing gene expression fold change between three groups (IRF3-2D vs EGFP, shIrf3 vs shLuc, and shIrf3 vs shLuc in the presence of LPS). Scale is log2 fold change. (B) Effect of IRF3 overexpression in mature 3T3-L1 adipocytes on insulin signaling genes from Cluster 2 of RNA-seq, validated by qPCR. Data is presented as mean  $\pm$  SEM. \* $p$ <0.05 (C-F) Number of upregulated or downregulated genes by IRF3 expression between five groups (IRF3-2D vs EGFP, shIrf3 vs shLuc, shLuc vs shLuc in the presence of LPS, shIrf3 vs shIrf3 in the presence of LPS, and shIrf3 vs shLuc in the presence of LPS).

**Supplemental Figure 5. Characteristics of *Irf3*<sup>-/-</sup> mice on chow diet.**

(A) Expression of IRF3 target inflammatory genes in eWAT by qPCR. (B) Plasma cytokine levels measured in *Irf3*<sup>-/-</sup> mice. (C) Body weight of WT and *Irf3*<sup>-/-</sup> mice. (D) Body composition determined in *Irf3*<sup>-/-</sup> mice. All data from male chow-fed 16 week old control and *Irf3*<sup>-/-</sup> mice, n=6-7/genotype. Data is presented as mean  $\pm$  SEM. For all data, \* $p$ <0.05.

**Supplemental Figure 6. Effect of *Irf3* deficiency on insulin sensitivity in chow and HFD fed mice.**

(A) Glucose tolerance test (GTT) in *Irf3*<sup>-/-</sup> mice after 8 weeks on chow diet. (B) Insulin tolerance test (ITT) in *Irf3*<sup>-/-</sup> mice after 10 weeks on chow diet. (C) Fasting plasma glucose levels in *Irf3*<sup>-/-</sup> mice after 8 and 10 weeks on HFD. (D) Western blot showing insulin signaling in eWAT of *Irf3*<sup>-/-</sup> mice on HFD. (E) Quantification of Western blot in Supplemental Figure 6D. (F) Western blot showing insulin signaling in liver of *Irf3*<sup>-/-</sup> mice on HFD. (G) Quantification of Western blot in Supplemental Figure 6F. N=6-7/genotype for chow studies. N= 7-8/genotype for HFD studies. Data is presented as mean ± SEM. For all data \**p*<0.05.

**Supplemental Figure 7. Hyperinsulinemic-euglycemic clamp in *Irf3*<sup>-/-</sup> mice on HFD.**

(A) Fasting and clamped glucose levels in control and *Irf3*<sup>-/-</sup> mice after 8 weeks of HFD feeding. (B) Fasting and clamped insulin levels in control and *Irf3*<sup>-/-</sup> mice. (C) Fasting and clamped non-esterified fatty acids (NEFAs) levels in control and *Irf3*<sup>-/-</sup> mice. For all data N=8-10 per genotype. Data is presented as mean ± SEM.

**Supplemental Figure 8. Effect of *Irf3* deficiency on Glut4 and adiponectin levels in HFD fed mice.**

(A) Adiponectin (*Adipoq*) mRNA levels in 3T3-L1 adipocytes following overexpression or knockdown of IRF3 by qPCR. (B) Expression of *Adipoq* in eWAT and iWAT of WT and *Irf3*<sup>-/-</sup> mice on HFD by qPCR. (C) Plasma adiponectin levels in WT and *Irf3*<sup>-/-</sup> mice on HFD. (D) Glut4 protein levels in eWAT and iWAT of chow vs HFD mice determined by Western blotting. (E) Gene expression of *Slc2a4* in 3T3-L1 adipocytes with overexpression and knockdown of murine IRF3. N=4 for in vitro studies. N= 7-8/genotype for HFD studies. Data is presented as mean ± SEM. For all data \**p*<0.05.

**Supplemental Figure 9. Energy expenditure and expression of thermogenic genes in BAT of *Ir33*<sup>-/-</sup> mice on HFD.**

CLAMS study was performed on *Ir33*<sup>-/-</sup> mice upon 16 weeks of HFD feeding to determine effect on (A) food intake, (B) activity, (C) respiratory exchange ratio (RER), and (D) heat production. (E) Histology showing H&E staining in BAT of *Ir33*<sup>-/-</sup> mice on HFD (10X magnification). (F) Expression of thermogenic and  $\beta$ -oxidation genes in BAT of *Ir33*<sup>-/-</sup> mice on HFD. For all data n=7-8/genotype. Data is presented as mean  $\pm$  SEM. For all data, \* $p$ <0.05.

**Supplemental Figure 10. Energy expenditure and expression of thermogenic genes in BAT of *Ir33*<sup>-/-</sup> mice on HFD before body weight divergence.**

Male wild-type and *Ir33*<sup>-/-</sup> mice were fed HFD and used for CLAMS study. N=6/genotype. (A) Body weight of WT and *Ir33*<sup>-/-</sup> mice during 10 weeks HFD feeding. (B) Body composition of WT and *Ir33*<sup>-/-</sup> mice at 8 weeks of HFD feeding. (C) Tissue weight of WT and *Ir33*<sup>-/-</sup> mice after 10 weeks on HFD. (D) Food intake, (E) activity, (F) respiratory exchange ratio (RER), and (G) heat production in *Ir33*<sup>-/-</sup> mice upon 8 weeks of HFD. (H) Histology showing H&E staining in BAT of *Ir33*<sup>-/-</sup> mice upon 10 weeks of HFD (10X magnification). (I) Expression of thermogenic and  $\beta$ -oxidation genes in BAT of *Ir33*<sup>-/-</sup> mice upon 10 weeks of HFD. Data is presented as mean  $\pm$  SEM. For all data \* $p$ <0.05.

## **2. Supplemental Table Legends**

**Supplemental Table 1. Human subjects characteristic and plasma parameters.**

**Supplemental Table 2. List of genes coordinately regulated by overexpression and knock-down of murine IRF3.** Numbers represent log2 fold change with  $\leq 25\%$  FDR.

**Supplemental Table 3. Top pathways enriched in the three major clusters identified in Figure 3B by GSEA using DAVID.**

**Supplemental Table 4. List of pathways regulated in clusters identified in Figure 3B with  $\leq 25\%$  FDR.**

**Supplemental Table 5. Plasma parameters of *Irf3*<sup>-/-</sup> mice on chow and high-fat diet.** Plasma samples were collected from 16 week old male *Irf3*<sup>-/-</sup> mice on chow and high-fat diet (HFD) in the fed state. Data is represented as mean  $\pm$  SEM. N=6-7/group (chow), N=7-8/group (HFD), \* $p < 0.01$ .

**Supplemental Table 6. List of qPCR primers used in this study.**

# Supplemental Figures

## Supplemental Figure 1

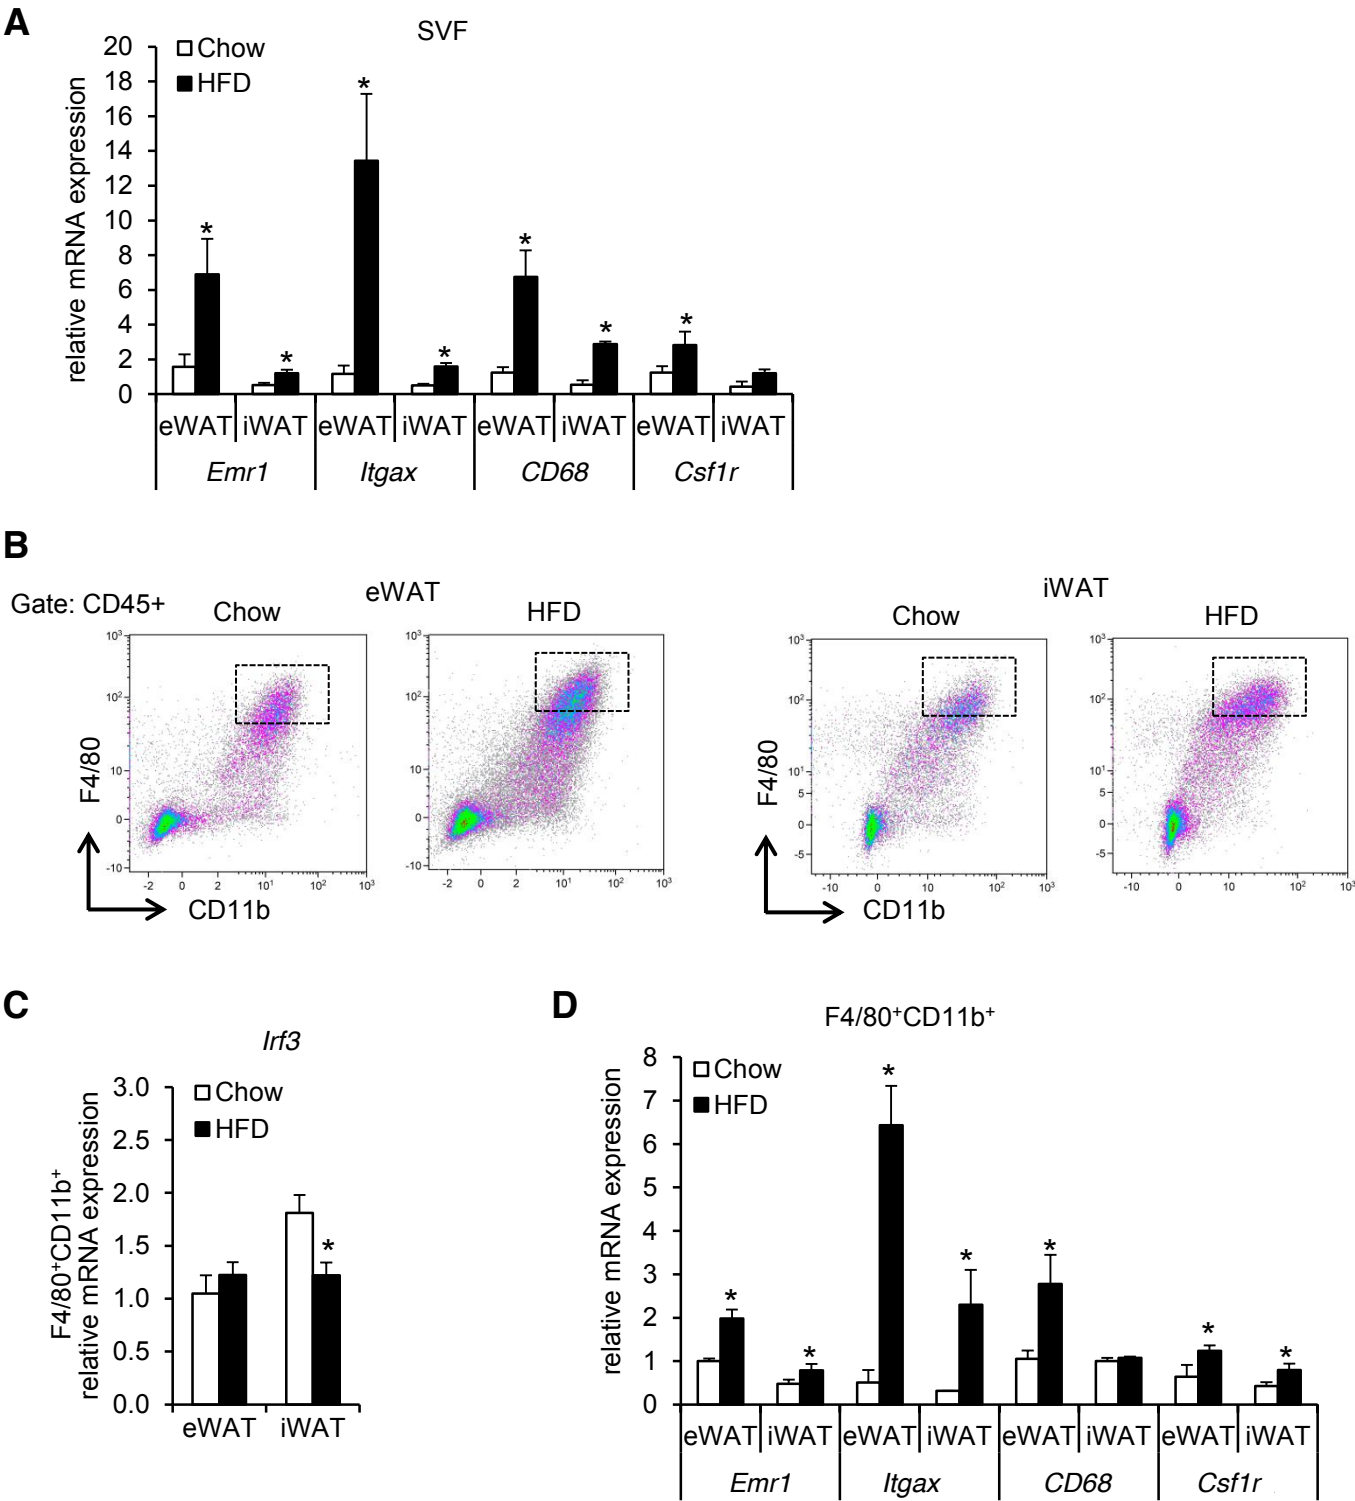

**Supplemental Figure 1. Expression of macrophage markers in SVF from HFD mice.**

(A) Expression of macrophage marker genes in isolated stromal-vascular fraction (SVF) of adipose tissue (eWAT and iWAT) from chow and HFD fed mice by qPCR. (B) SVF isolated from eWAT and iWAT of chow and HFD fed mice were gated for live CD45<sup>+</sup> cells. Representative scatter-plot showing macrophages stained with F4/80 and CD11b antibody. (C and D) Expression of *Irf3* and macrophage marker genes in sorted F4/80<sup>+</sup> CD11b<sup>+</sup> macrophages by FACS. n=5-6/group. Data is presented as mean ± SEM. For all data, \*p<0.05.

# Supplemental Figure 2

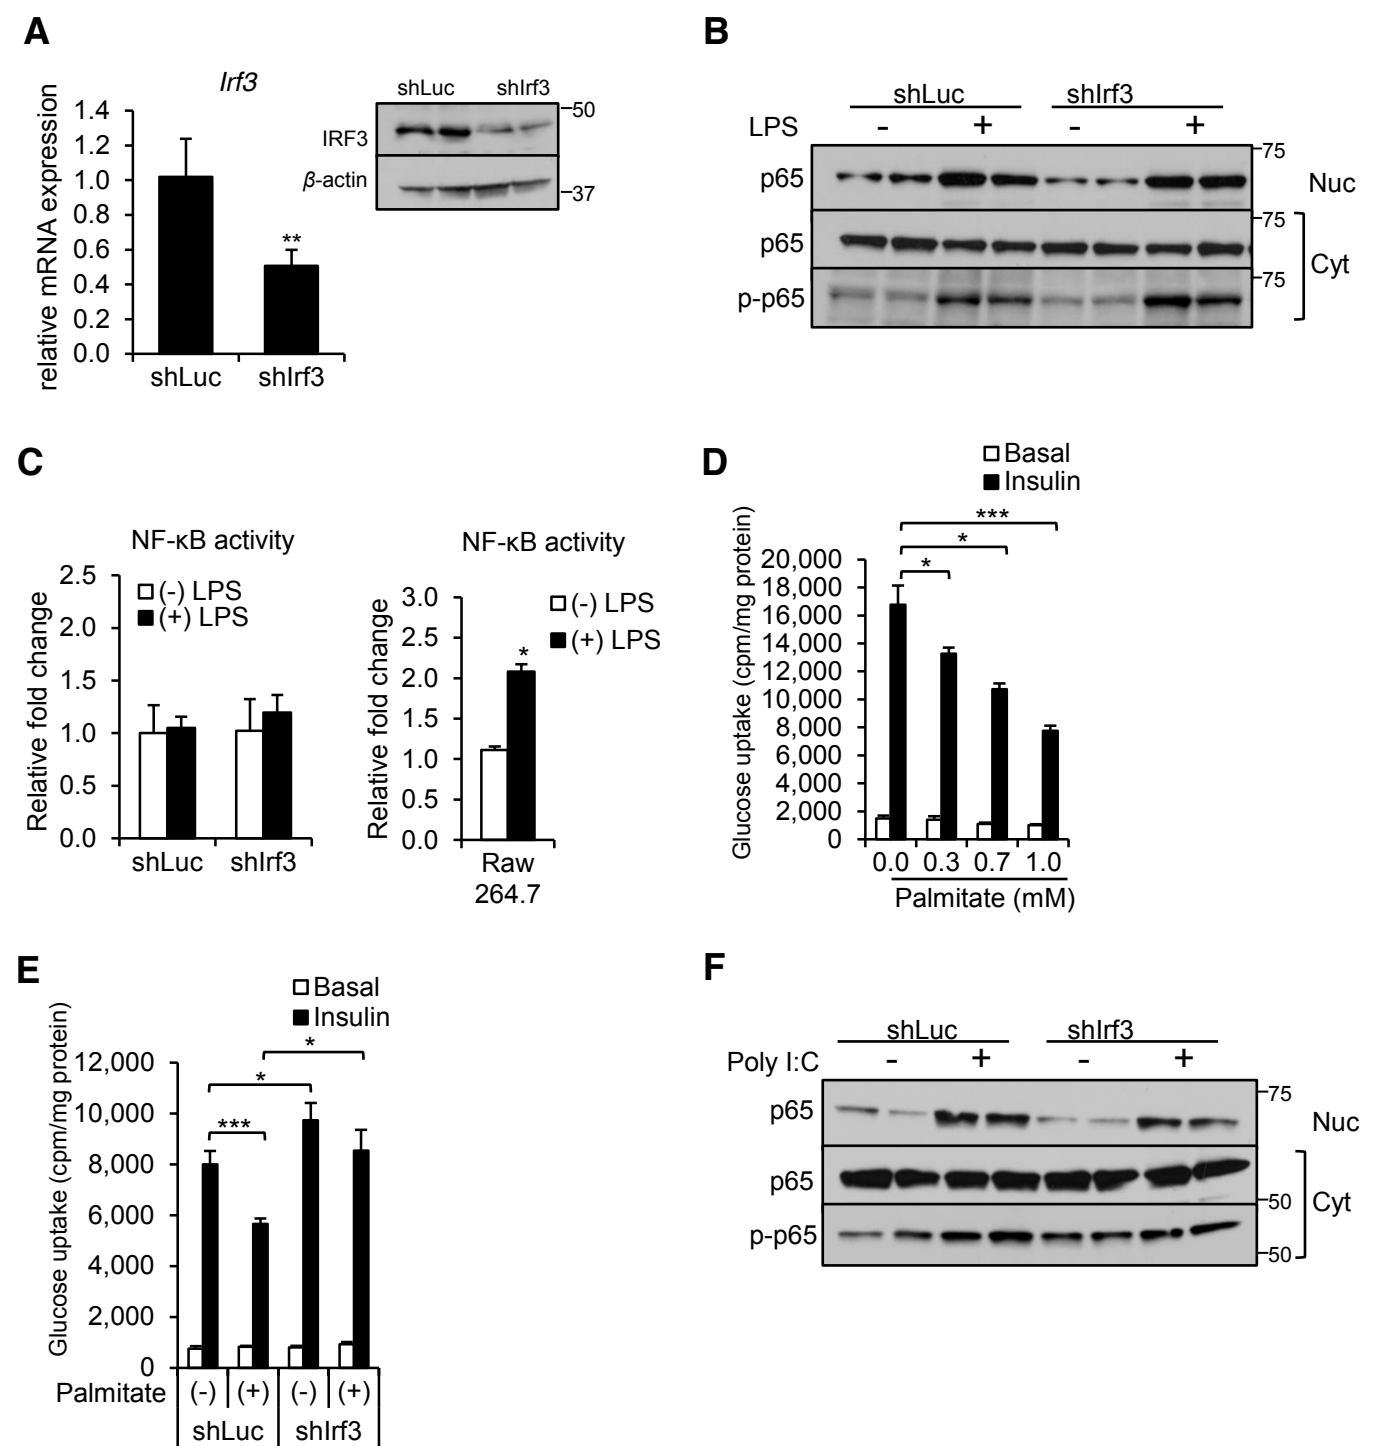

**Supplemental Figure 2. Effect of LPS, palmitate and poly I:C treatment in the absence or presence of IRF3.** (A) Expression of mouse IRF3 at mRNA and protein level in mature 3T3-L1 adipocytes transduced with lentivirus expressing shRNA against mouse *Irf3*, determined by qPCR and Western blotting.  $n=4$ . (B) Western blot showing effect of LPS treatment on protein levels of p65 and phospho-p65 in isolated nuclei and/or cytosolic fraction of 3T3-L1 adipocytes. (C) Effect of LPS (700 ng/ml) treatment for 6 days on NF- $\kappa$ B activity in the isolated nuclei fraction from 3T3-L1 adipocytes using TransAm NF- $\kappa$ B activity kit. Lysate from Raw 264.7 cells treated with LPS (700 ng/ml) for 1 h was used as a positive control. (D) Basal and insulin-stimulated glucose uptake in 3T3-L1 adipocytes after treatment with varying doses of palmitate for 48 h. (E) Basal and insulin-stimulated glucose uptake in 3T3-L1 adipocytes transduced with lentivirus expressing shRNA against *Irf3* or shLuc control hairpin in the absence or presence of palmitate treatment (1 mM). (F) Western blot showing effect of poly I:C treatment on protein levels of p65 and phospho-p65 in isolated nuclei and/or cytosolic fraction of 3T3-L1 adipocytes. Data is presented as mean  $\pm$  SEM. \*\*\* $p<0.001$ , \*\* $p<0.01$ , \* $p<0.05$ .



Supplemental Figure 3

A

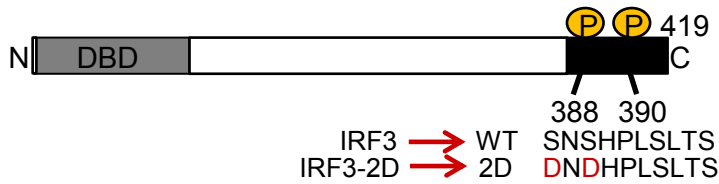

B

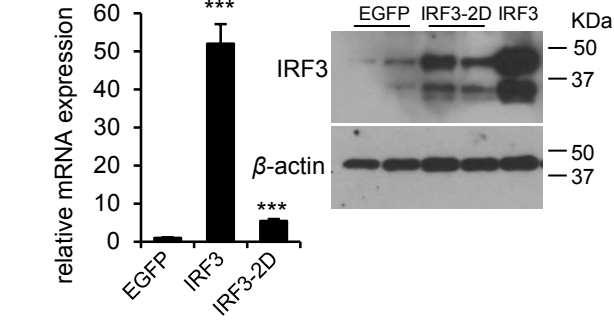

C

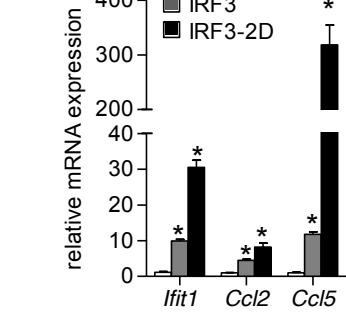

D

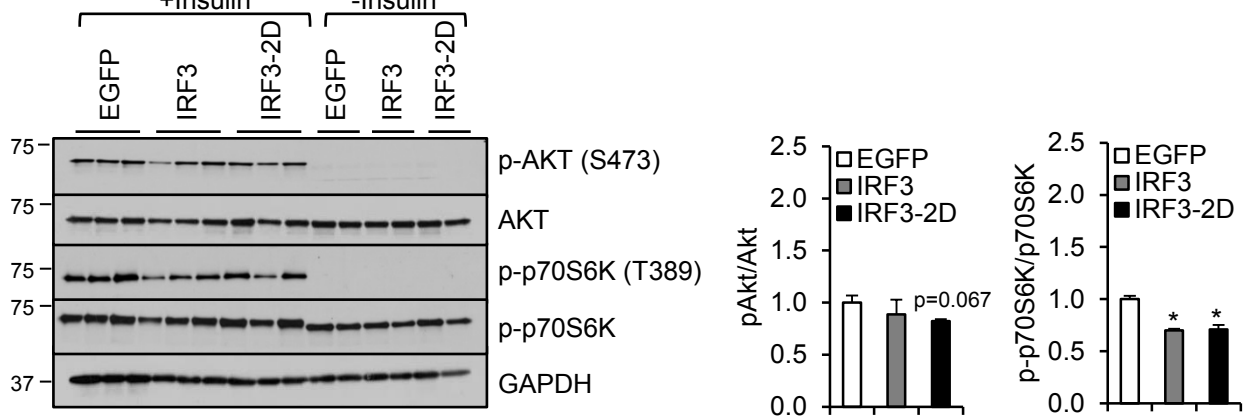

Supplemental Figure 3. Effect of IRF3 overexpression on insulin signaling in 3T3-L1 adipocytes.

(A) Schematic representation of the wild-type IRF3 and mutant IRF3 (IRF3-2D) protein. (B) Overexpression of mouse IRF3 and IRF3-2D mutant at mRNA and protein level in mature 3T3-L1 adipocytes transduced with lentivirus, determined by qPCR and Western blotting. n=4. (C) Effect of IRF3 overexpression on inflammatory gene expression by lentivirus transduction in mature 3T3-L1 adipocytes using qPCR. n=4. (D) Effect of IRF3 overexpression on insulin signaling in mature 3T3-L1 adipocytes by Western blotting. Data is presented as mean  $\pm$  SEM. \* $p$ <0.05, \*\*\* $p$ <0.001.

Supplemental Figure 4

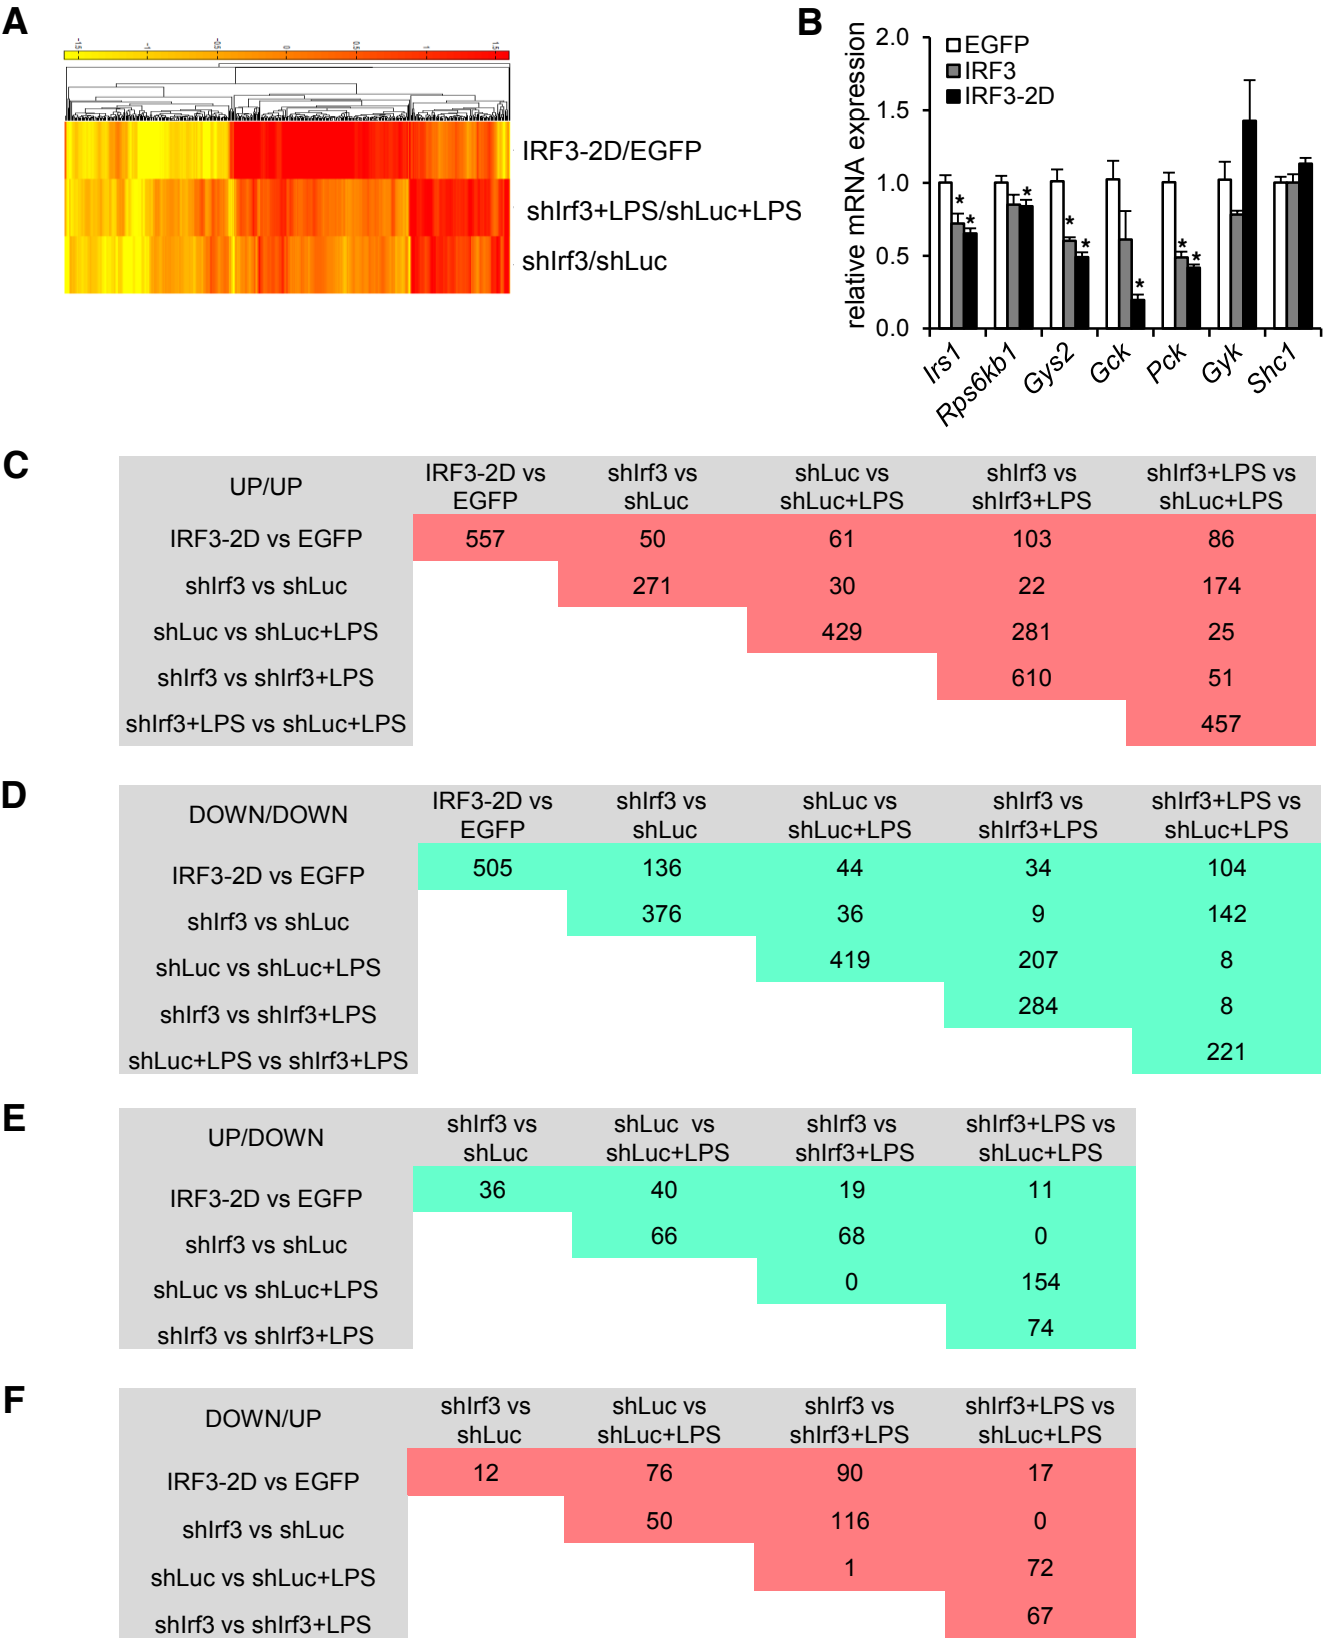

**Supplemental Figure 4. Differentially regulated genes by IRF3 overexpression or knockdown in the absence or presence of LPS.**

(A) Heat map showing gene expression fold change between three groups (IRF3-2D vs EGFP, shIrf3 vs shLuc, and shIrf3 vs shLuc in the presence of LPS). Scale is log2 fold change. (B) Effect of IRF3 overexpression in mature 3T3-L1 adipocytes on insulin signaling genes from Cluster 2 of RNA-seq, validated by qPCR. Data is presented as mean ± SEM. \**p*<0.05. (C-F) Number of upregulated or downregulated genes by IRF3 expression between five groups (IRF3-2D vs EGFP, shIrf3 vs shLuc, shLuc vs shLuc in the presence of LPS, shIrf3 vs shIrf3 in the presence of LPS, and shIrf3 vs shLuc in the presence of LPS).

# Supplemental Figure 5

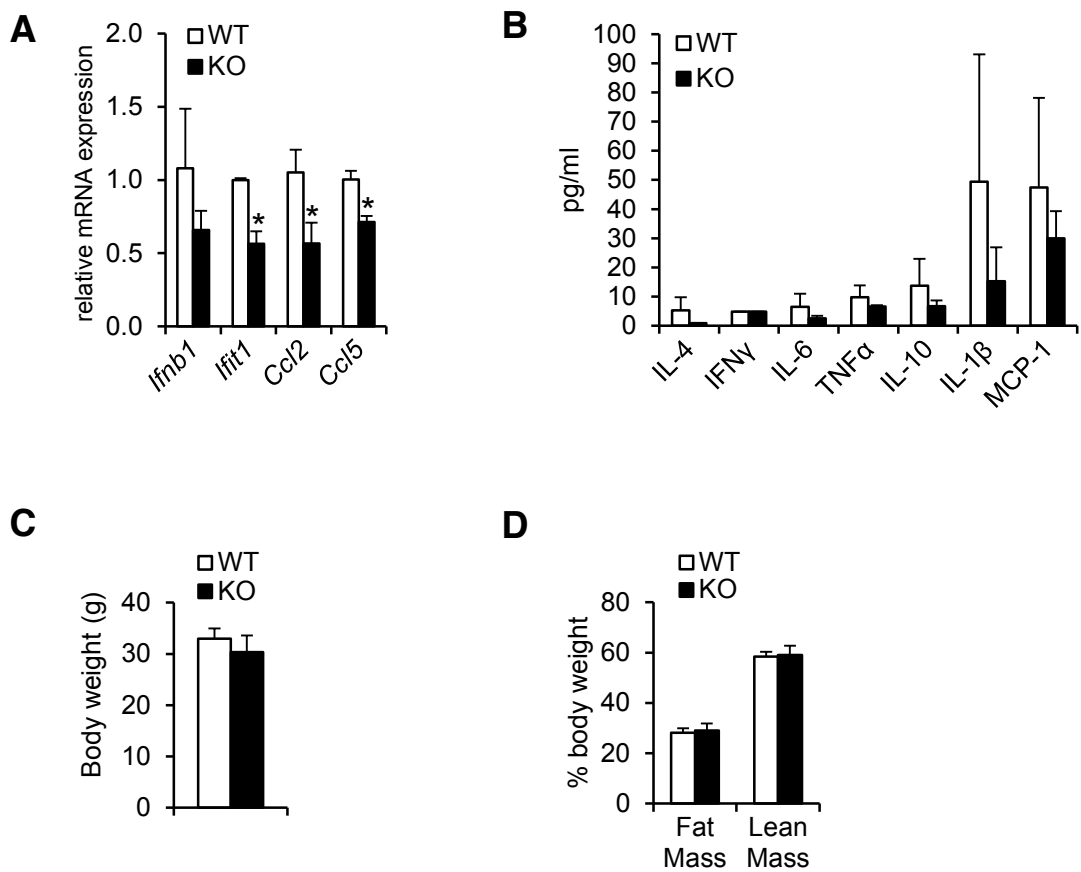

**Supplemental Figure 5. Characteristics of *Irf3*<sup>-/-</sup> mice on chow diet.** (A) Expression of IRF3 target inflammatory genes in eWAT by qPCR. (B) Plasma cytokine levels measured in *Irf3*<sup>-/-</sup> mice. (C) Body weight of WT and *Irf3*<sup>-/-</sup> mice. (D) Body composition determined in *Irf3*<sup>-/-</sup> mice. All data from male chow-fed 16 week old control and *Irf3*<sup>-/-</sup> mice, n=6-7/genotype. Data is presented as mean  $\pm$  SEM. For all data, \**p*<0.05.

# Supplemental Figure 6

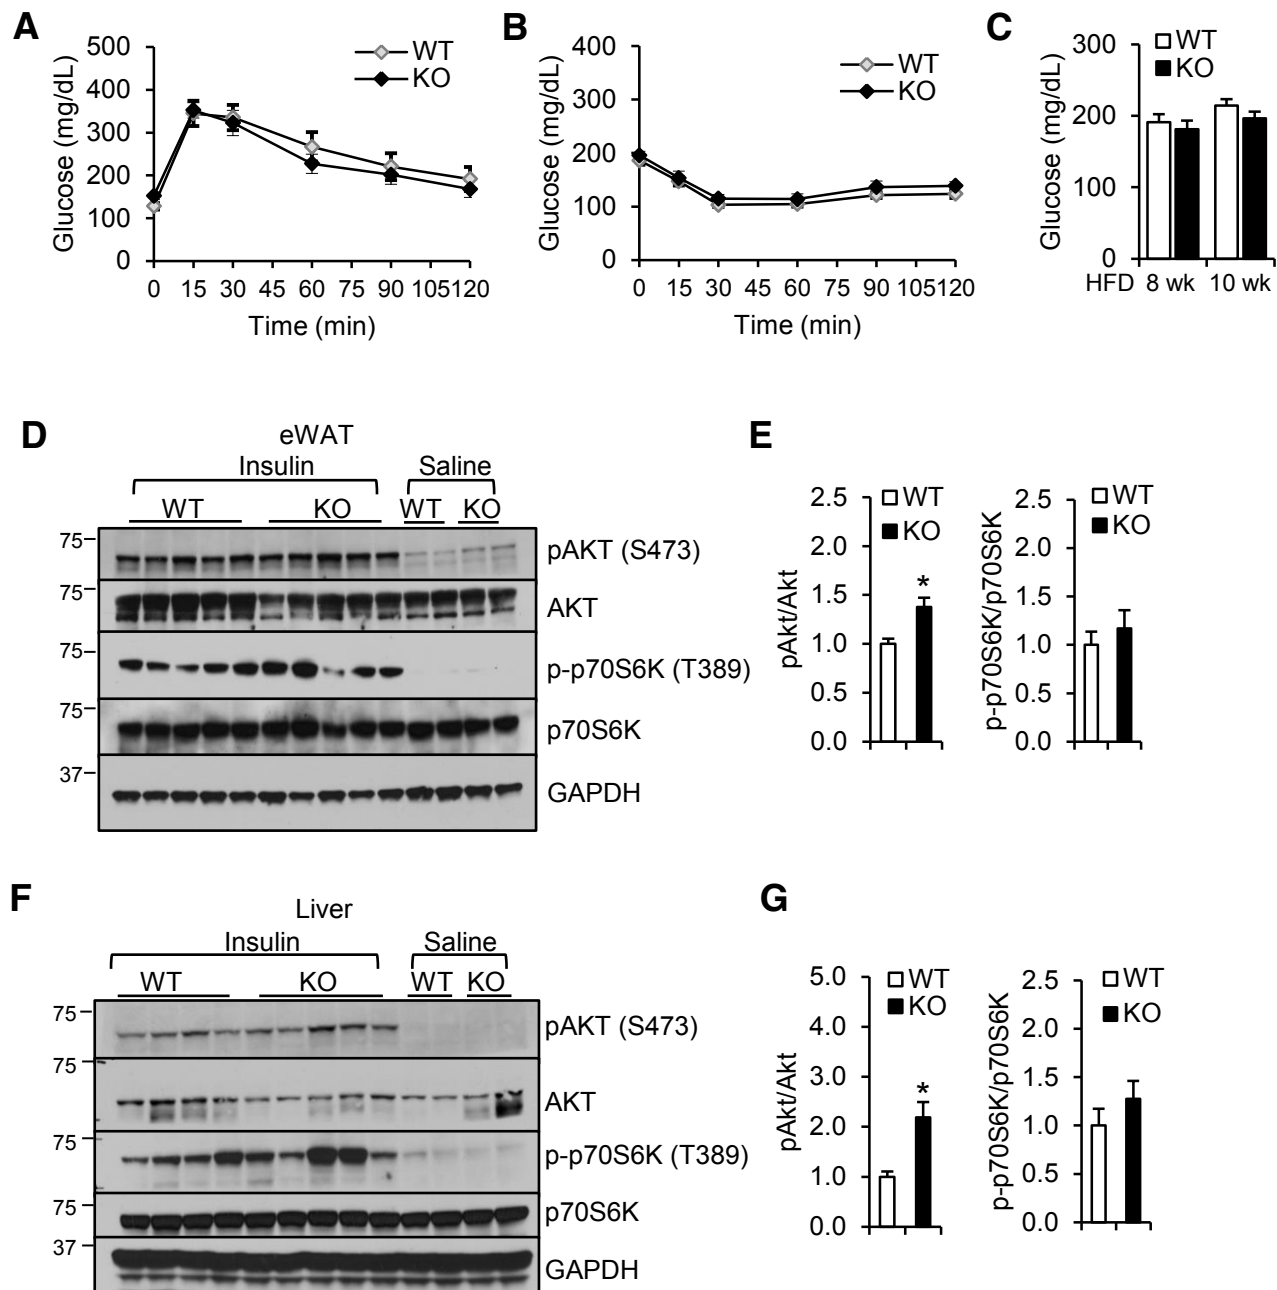

## Supplemental Figure 6. Effect of *Irf3* deficiency on insulin sensitivity in chow and HFD fed mice.

(A) Glucose tolerance test (GTT) in *Irf3*<sup>-/-</sup> mice after 8 weeks on chow diet. (B) Insulin tolerance test (ITT) in *Irf3*<sup>-/-</sup> mice after 10 weeks on chow diet. (C) Fasting plasma glucose levels in *Irf3*<sup>-/-</sup> mice after 8 and 10 weeks on HFD. (D) Western blot showing insulin signaling in eWAT of *Irf3*<sup>-/-</sup> mice on HFD. (E) Quantification of Western blot in Supplemental Figure 6D. (F) Western blot showing insulin signaling in liver of *Irf3*<sup>-/-</sup> mice on HFD. (G) Quantification of Western blot in Supplemental Figure 6F. N=6-7/genotype for chow studies. N= 7-8/genotype for HFD studies. Data is presented as mean  $\pm$  SEM. For all data \* $p$ <0.05.

Supplemental Figure 7

A

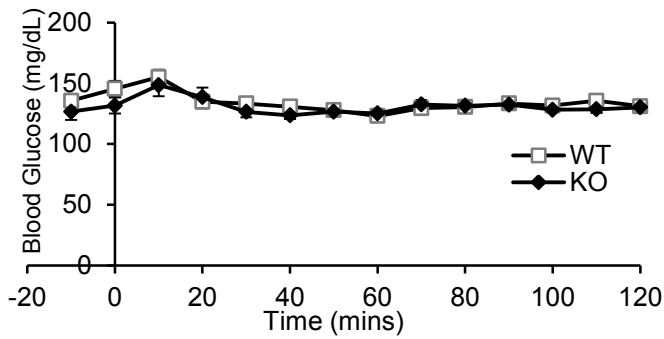

B

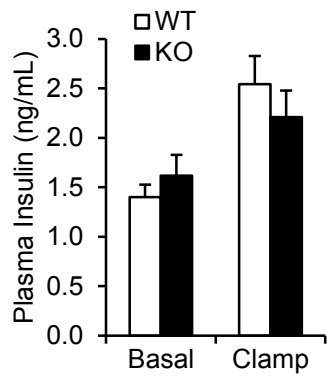

C

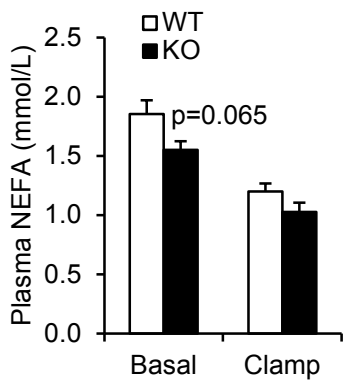

**Supplemental Figure 7. Hyperinsulinemic-euglycemic clamp in *Irf3*<sup>-/-</sup> mice on HFD.**  
(A) Fasting and clamped glucose levels in control and *Irf3*<sup>-/-</sup> mice after 8 weeks of HFD feeding. (B) Fasting and clamped insulin levels in control and *Irf3*<sup>-/-</sup> mice. (C) Fasting and clamped non-esterified fatty acids (NEFAs) levels in control and *Irf3*<sup>-/-</sup> mice. For all data N=8-10 per genotype. Data is presented as mean ± SEM.

Supplemental Figure 8

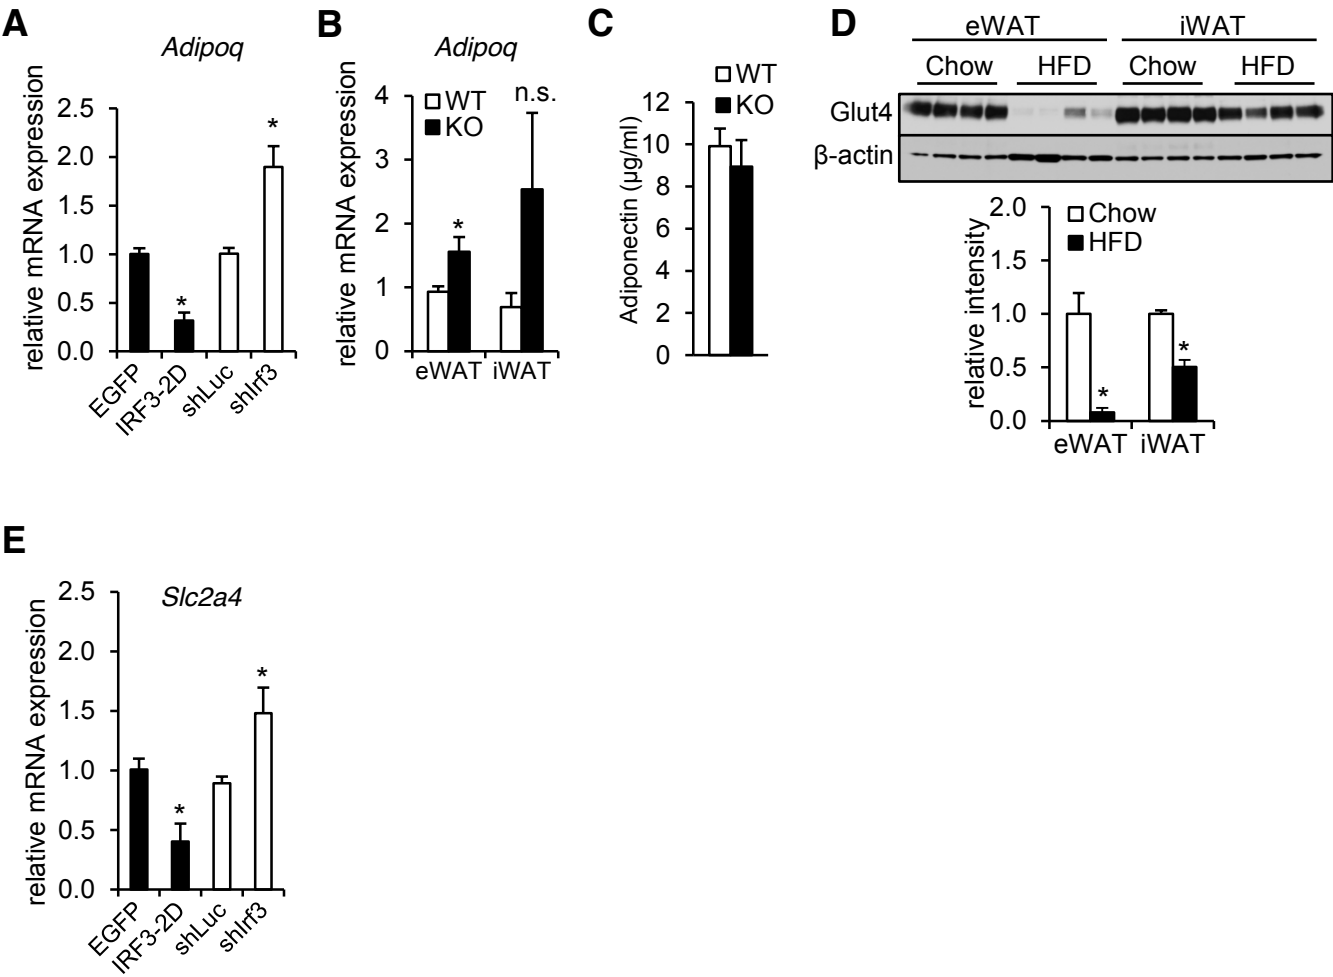

**Supplemental Figure 8. Effect of *Irf3* deficiency on Glut4 and adiponectin levels in HFD fed mice.**

(A) Adiponectin (*Adipoq*) mRNA levels in 3T3-L1 adipocytes following overexpression or knockdown of IRF3 by qPCR. (B) Expression of *Adipoq* in eWAT and iWAT of WT and *Irf3*<sup>-/-</sup> mice on HFD by qPCR. (C) Plasma adiponectin levels in WT and *Irf3*<sup>-/-</sup> mice on HFD. (D) Glut4 protein levels in eWAT and iWAT of chow vs HFD mice determined by Western blotting. (E) Gene expression of *Slc2a4* in 3T3-L1 adipocytes with overexpression and knockdown of murine IRF3. N=4 for in vitro studies. N= 7-8/genotype for HFD studies. Data is presented as mean ± SEM. For all data \**p*<0.05.

Supplemental Figure 9

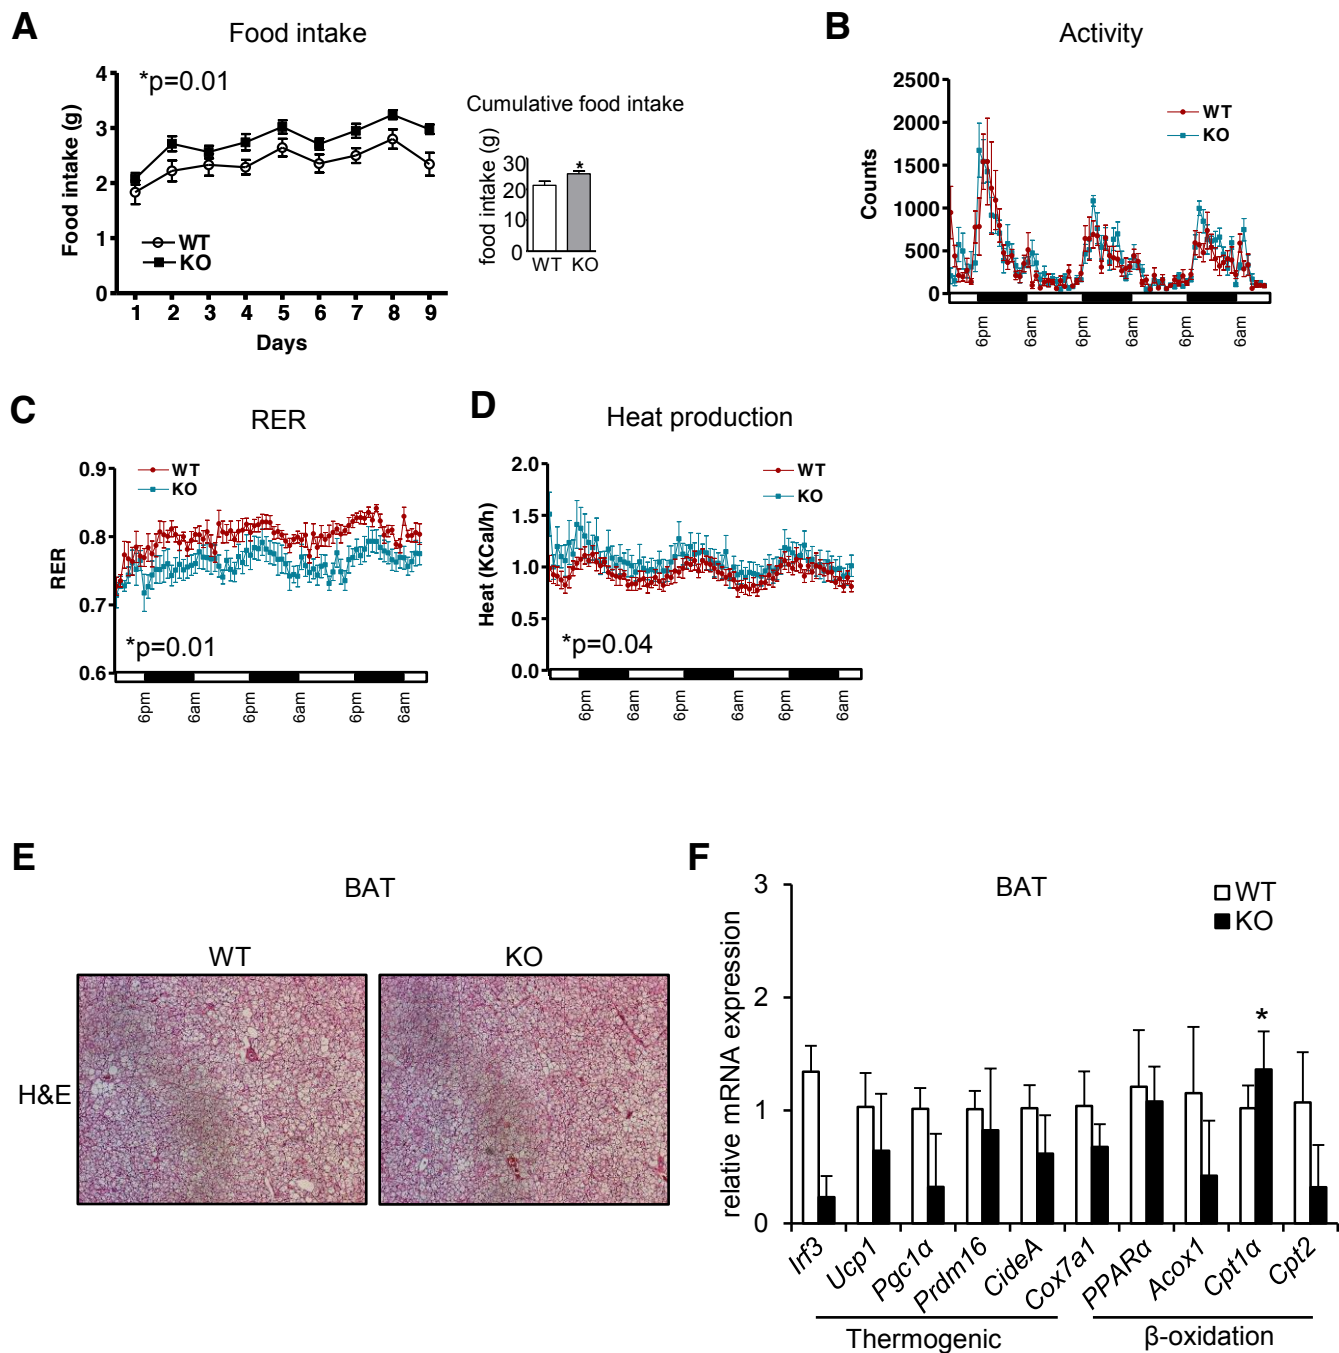

**Supplemental Figure 9. Energy expenditure and expression of thermogenic genes in BAT of *Irf3*<sup>-/-</sup> mice on HFD.**

CLAMS study was performed on *Irf3*<sup>-/-</sup> mice upon 16 weeks of HFD feeding to determine effect on (A) food intake, (B) activity, (C) respiratory exchange ratio (RER), and (D) heat production. (E) Histology showing H&E staining in BAT of *Irf3*<sup>-/-</sup> mice on HFD (10X magnification). (F) Expression of thermogenic and  $\beta$ -oxidation genes in BAT of *Irf3*<sup>-/-</sup> mice on HFD. For all data n=7-8/genotype. Data is presented as mean  $\pm$  SEM. For all data, \*p<0.05.

Supplemental Figure 10

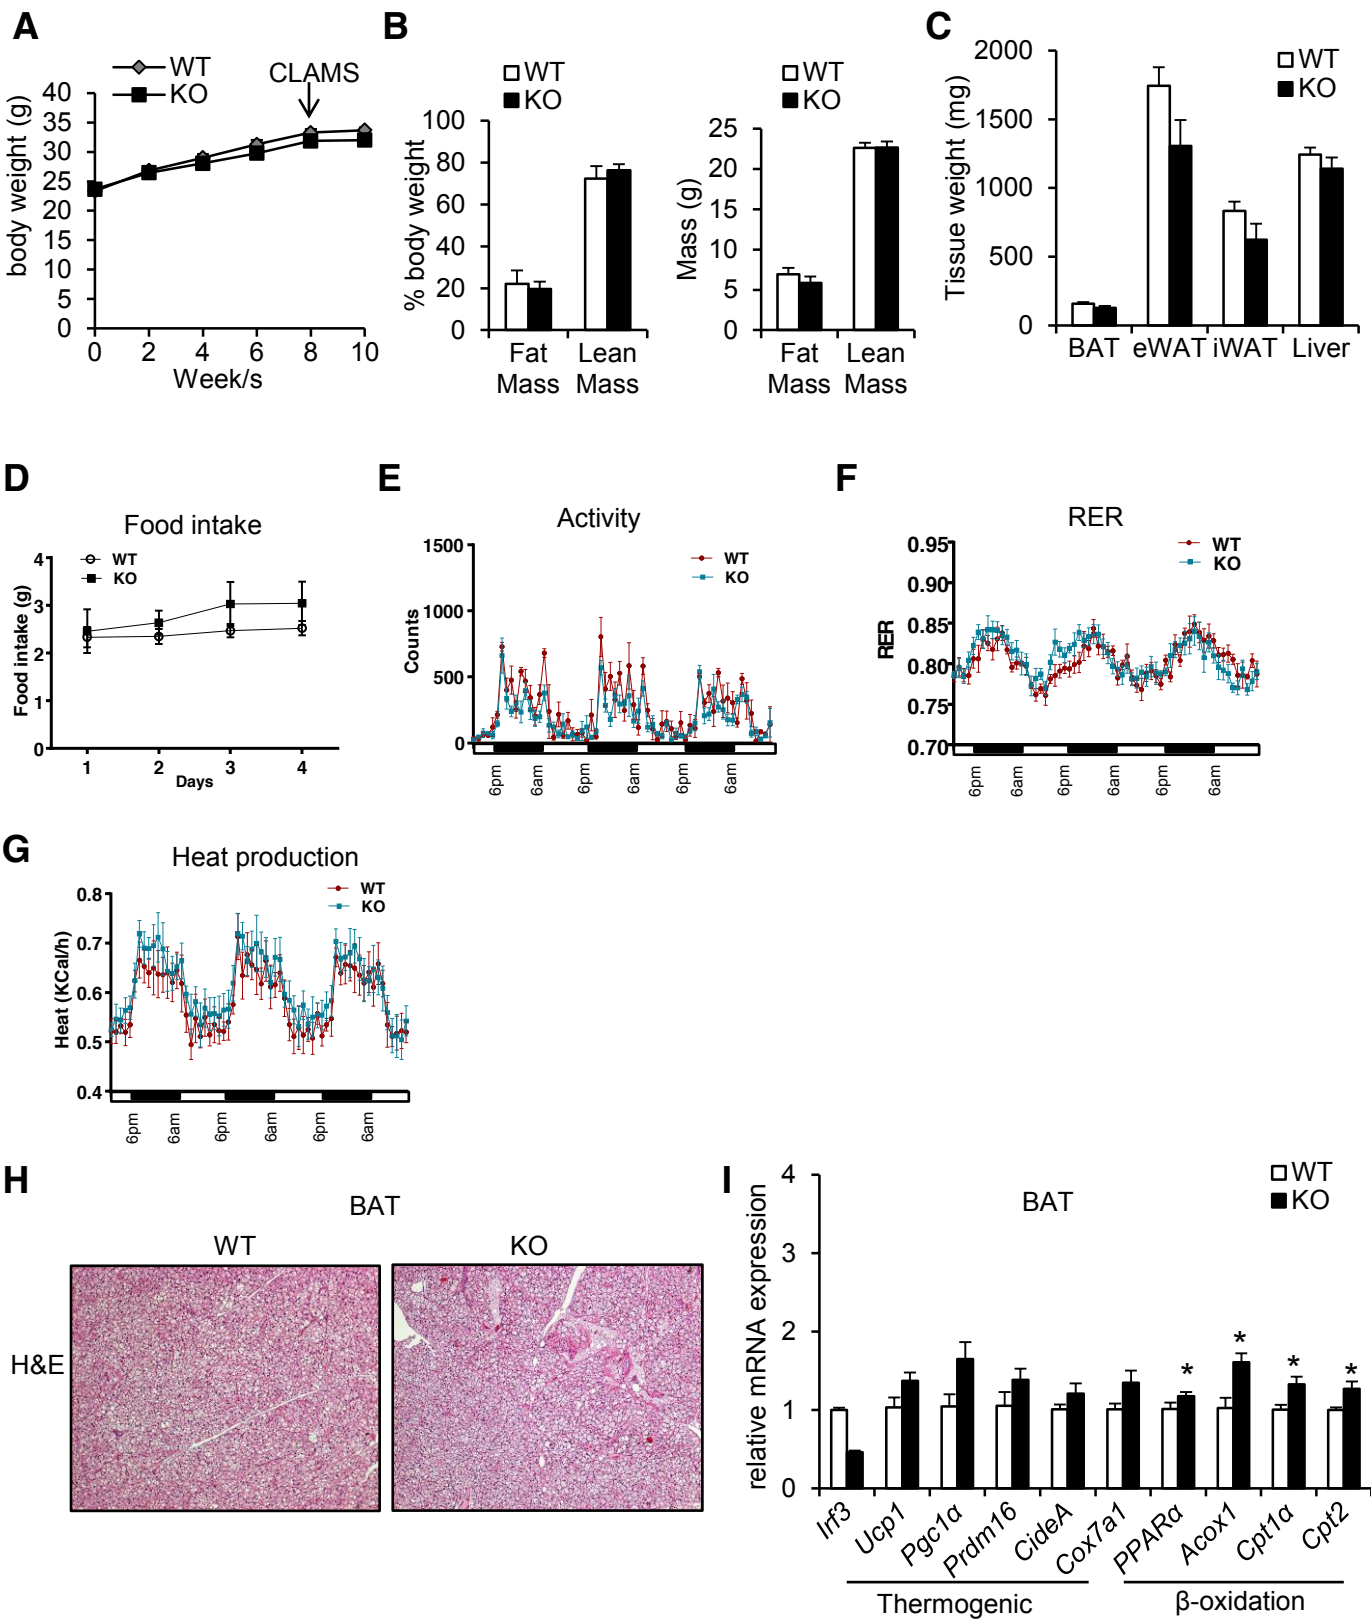

**Supplemental Figure 10. Energy expenditure and expression of thermogenic genes in BAT of *Irf3*<sup>-/-</sup> mice on HFD before body weight divergence.** Male wild-type and *Irf3*<sup>-/-</sup> mice were fed HFD and used for CLAMS study. N=6/genotype. **(A)** Body weight of WT and *Irf3*<sup>-/-</sup> mice during 10 weeks HFD feeding. **(B)** Body composition of WT and *Irf3*<sup>-/-</sup> mice at 8 weeks of HFD feeding. **(C)** Tissue weight of WT and *Irf3*<sup>-/-</sup> mice after 10 weeks on HFD. **(D)** Food intake, **(E)** activity, **(F)** respiratory exchange ratio (RER), and **(G)** heat production in *Irf3*<sup>-/-</sup> mice upon 8 weeks of HFD. **(H)** Histology showing H&E staining in BAT of *Irf3*<sup>-/-</sup> mice upon 10 weeks of HFD (10X magnification). **(I)** Expression of thermogenic and  $\beta$ -oxidation genes in BAT of *Irf3*<sup>-/-</sup> mice upon 10 weeks of HFD. Data is presented as mean  $\pm$  SEM. For all data \* $p$ <0.05.



**Supplemental Table 1. Human subjects characteristic and plasma parameters.**

| Parameters                     | Non-Diabetic<br>(Mean±SD) | Diabetic<br>(Mean±SD) |
|--------------------------------|---------------------------|-----------------------|
| Number (N)                     | 48                        | 45                    |
| Gender(Female/Male)            | 25/23                     | 21/24                 |
| Age (yrs)                      | 44.79±11.82               | 53.98±7.83            |
| BMI (kg/m <sup>2</sup> )       | 30.88±4.72                | 31.50±3.50            |
| Fasting Blood Glucose (mmol/l) | 5.40±1.11                 | 8.57±2.66             |
| HDL cholesterol (mmol/l)       | 1.30±0.35                 | 1.16±0.32             |
| LDL cholesterol (mmol/l)       | 3.31±0.83                 | 2.82±1.16             |
| Triglycerides (mmol/l)         | 1.09±0.67                 | 1.67±1.02             |
| Cholesterol (mmol/l)           | 5.11±0.96                 | 4.85±1.36             |
| HbA1C (%)                      | 5.83±1.09                 | 7.94±1.50             |

**Supplemental Table 2. List of genes coordinately regulated by overexpression and knock-down of murine IRF3.** Numbers represent log2 fold change with ≤25% FDR.

| Gene          | IRF3-2D vs EGFP | shlr3 vs shLuc |
|---------------|-----------------|----------------|
| Adam6a        | -1.5            | 1.9            |
| Mmp9          | -1.3            | 1.3            |
| Gldc          | -1.1            | 0.8            |
| Lyl1          | -0.9            | 0.7            |
| Mmp8          | -0.9            | 2.2            |
| Mmp13         | -0.9            | 1.5            |
| Srpx2         | -0.9            | 0.5            |
| Otop1         | -0.7            | 0.7            |
| Nwd1          | -0.7            | 1.7            |
| Pygb          | -0.6            | 0.5            |
| Ces1a         | -0.6            | 0.7            |
| Pappa2        | -0.6            | 0.5            |
| Atp1b1        | -0.5            | 0.6            |
| Thbs1         | -0.5            | 0.4            |
| DQ539915      | -0.4            | 0.5            |
| Fbxl13        | -0.4            | 0.6            |
| Gpx1          | -0.4            | 0.4            |
| Dcn           | -0.3            | 0.4            |
| Npr3          | -0.3            | 0.4            |
| Plat          | -0.3            | 0.8            |
| Pros1         | -0.3            | 0.5            |
| Tmeff1        | -0.3            | 0.3            |
| Usp35         | -0.3            | 0.4            |
| Irf3          | 0.2             | -0.7           |
| Atp10d        | 0.3             | -0.3           |
| Itih4         | 0.3             | -1             |
| Laptn4b       | 0.3             | -0.5           |
| Ces4a         | 0.4             | -0.7           |
| Emp1          | 0.4             | -0.5           |
| Tsta3         | 0.4             | -0.3           |
| C4b           | 0.5             | -1.6           |
| H2-Q8         | 0.5             | -0.6           |
| AW112010      | 0.5             | -0.9           |
| Tmsb4x        | 0.6             | -0.6           |
| Tdo2          | 0.6             | -0.8           |
| Bub1          | 0.6             | -0.7           |
| Pde4b         | 0.6             | -0.6           |
| Exo1          | 0.6             | -0.7           |
| Ifi27l2a      | 0.6             | -0.6           |
| Agpat9        | 0.7             | -0.6           |
| H2-Q1         | 0.7             | -0.7           |
| Cox6a2        | 0.7             | -0.6           |
| 2410017117Rik | 0.7             | -0.6           |
| Aurkb         | 0.8             | -0.6           |
| Dapk1         | 0.8             | -1.2           |
| Gm8909        | 0.8             | -0.5           |
| H2-Q2         | 0.8             | -0.7           |
| H2-K2         | 0.8             | -0.6           |
| H2-K1         | 0.8             | -0.8           |
| H2-BI         | 0.9             | -0.8           |
| Nlrc5         | 0.9             | -0.5           |
| Hist1h3h      | 1               | -0.8           |
| Cyp2b10       | 1               | -1             |
| H2-D1         | 1               | -0.4           |
| H2-Gs10       | 1               | -0.7           |
| H2-Q6         | 1.1             | -0.6           |
| H2-T23        | 1.2             | -0.8           |
| Gbp11         | 1.2             | -0.8           |
| Oasl1         | 1.3             | -0.7           |
| Gbp2          | 1.4             | -0.5           |
| Chchd10       | 1.4             | -0.6           |
| Nlrp2         | 1.5             | -1.7           |
| AI607873      | 1.8             | -0.5           |
| Gbp4          | 1.9             | -0.6           |
| Psmb9         | 2.3             | -0.9           |
| BC023105      | 2.5             | -0.8           |
| Gm12185       | 2.6             | -0.9           |
| Gbp10         | 2.8             | -1.9           |

Supplemental Table 3. Top pathways enriched in the three major clusters identified in Figure 3B by GSEA using DAVID.

|    | Pathways enriched      | p-value               |
|----|------------------------|-----------------------|
| C1 | Immune response        | 3.9X10 <sup>-15</sup> |
|    | Nucleotide binding     | 6.8X10 <sup>-7</sup>  |
|    | MHC protein complex    | 4.0X10 <sup>-5</sup>  |
| C2 | Insulin signaling      | 3.2X10 <sup>-2</sup>  |
| C3 | PPAR signaling pathway | 3.8X10 <sup>-3</sup>  |
|    | Lipid transport        | 1.1X10 <sup>-2</sup>  |

**Supplemental Table 4. List of pathways regulated in clusters identified in Figure 3B with ≤25% FDR.**

| Cluster 1 (C1)                                         |          | Cluster 2 (C2)            |          | Cluster 3 (C3)                                        |          |
|--------------------------------------------------------|----------|---------------------------|----------|-------------------------------------------------------|----------|
| Pathway                                                | pValue   | Pathway                   | pValue   | Pathway                                               | pValue   |
| immune response                                        | 3.89E-15 | cell junction             | 0.022229 | Secreted                                              | 0.00112  |
| 2'-5'-oligoadenylate synthetase 1, domain 2/C-terminal | 7.34E-10 | adherens junction         | 0.024905 | extracellular region part                             | 0.002057 |
| 2-5-oligoadenylate synthetase, ubiquitin-like region   | 1.27E-09 | Insulin signaling pathway | 0.032366 | zymogen                                               | 0.002373 |
| 2-5-oligoadenylate synthetase, conserved site          | 2.86E-09 |                           |          | chemotaxis                                            | 0.003315 |
| Guanylate-binding protein, C-terminal                  | 6.4E-09  |                           |          | taxis                                                 | 0.003315 |
| Guanylate-binding protein, N-terminal                  | 6.35E-08 |                           |          | triglyceride-rich lipoprotein particle                | 0.003657 |
| purine nucleotide binding                              | 7.63E-08 |                           |          | very-low-density lipoprotein particle                 | 0.003657 |
| guanine nucleotide-binding protein 1                   | 5.04E-07 |                           |          | PPAR signaling pathway                                | 0.00379  |
| nucleotide binding                                     | 6.75E-07 |                           |          | metal ion-binding site:Zinc 2; in inhibited form      | 0.004388 |
| purine ribonucleotide binding                          | 6.89E-07 |                           |          | integrin-mediated signaling pathway                   | 0.005257 |
| ribonucleotide binding                                 | 6.89E-07 |                           |          | extracellular region                                  | 0.005369 |
| response to virus                                      | 4.39E-06 |                           |          | endopeptidase activity                                | 0.006371 |
| 2'-5'-oligoadenylate synthetase activity               | 1.59E-05 |                           |          | locomotory behavior                                   | 0.006578 |
| nucleotidyltransferase activity                        | 2.58E-05 |                           |          | coenzyme A                                            | 0.008045 |
| adenyl nucleotide binding                              | 2.6E-05  |                           |          | metal ion-binding site:Zinc 2; catalytic              | 0.00864  |
| purine nucleoside binding                              | 3.07E-05 |                           |          | C-acyltransferase activity                            | 0.009664 |
| nucleoside binding                                     | 3.48E-05 |                           |          | Peptidase M10A, matrix metallopeotidase               | 0.010561 |
| MHC protein complex                                    | 4.03E-05 |                           |          | lipid transport                                       | 0.011292 |
| HIN-200/IF120x                                         | 5.58E-05 |                           |          | Peptidoglycan binding-like                            | 0.012967 |
| class I histocompatibility antigen                     | 6.83E-05 |                           |          | extracellular matrix                                  | 0.01362  |
| mhc i                                                  | 8.77E-05 |                           |          | Peptidase_M10A_matrix                                 | 0.013828 |
| antigen processing and presentation                    | 0.000113 |                           |          | Acyltransferase                                       | 0.013915 |
| ATP binding                                            | 0.000142 |                           |          | Nitrogen metabolism                                   | 0.014892 |
| Nucleotidyltransferase                                 | 0.000143 |                           |          | Hemopexin/matrixin                                    | 0.015587 |
| adenyl ribonucleotide binding                          | 0.000173 |                           |          | serpin                                                | 0.0161   |
|                                                        |          |                           |          | Hemopexin/matrixin, repeat                            | 0.016975 |
|                                                        |          |                           |          | Hemopexin/matrixin, conserved site                    | 0.016975 |
|                                                        |          |                           |          | integrin                                              | 0.018269 |
|                                                        |          |                           |          | domain:Hemopexin-like 4                               | 0.019033 |
|                                                        |          |                           |          | metal ion-binding site:Calcium 3; via carbonyl oxygen | 0.019033 |
|                                                        |          |                           |          | domain:Hemopexin-like 3                               | 0.019033 |
|                                                        |          |                           |          | cofactor binding                                      | 0.01993  |
|                                                        |          |                           |          | Biosynthesis of unsaturated fatty acids               | 0.020237 |
|                                                        |          |                           |          | proteinaceous extracellular matrix                    | 0.020591 |

**Supplemental Table 5. Plasma parameters of *lrf3*<sup>-/-</sup> mice on chow and high-fat diet.** Plasma samples were collected from 16 week old male *lrf3*<sup>-/-</sup> mice on chow and high-fat diet (HFD) in the fed state. Data is represented as mean ± SEM. N=6-7/group (chow), N=7-8/group (HFD), \**p*<0.01.

| Plasma Parameter | Chow         |                            | HFD         |                            |
|------------------|--------------|----------------------------|-------------|----------------------------|
|                  | WT           | <i>lrf3</i> <sup>-/-</sup> | WT          | <i>lrf3</i> <sup>-/-</sup> |
| Glucose (mg/dl)  | 224.0 ± 13.5 | 197.1 ± 7.4                | 211.6 ± 9.5 | 218.1 ± 22.3               |
| Insulin (ng/ml)  | 1.0 ± 0.4    | 0.6 ± 0.1                  | 4.2 ± 1.1   | 1.5 ± 0.4*                 |
| TG (mg/dl)       | 60.4 ± 5.1   | 55.2 ± 3.6                 | 83.3 ± 4.8  | 90.9 ± 7.4                 |
| NEFA (mM)        | 0.4 ± 0.06   | 0.3 ± 0.08                 | 0.8 ± 0.03  | 0.8 ± 0.09                 |

**Supplemental Table 6. List of qPCR primers used in this study.**

| <b>Gene Name<br/>(Symbol)</b>                                                                  | <b>Primer sequence<br/>(5' – 3')</b>                            | <b>GenBank Acc.<br/>No.</b> |
|------------------------------------------------------------------------------------------------|-----------------------------------------------------------------|-----------------------------|
| <b>2'-5' oligoadenylate synthetase-like 2 (Oasl2)</b>                                          | F: TTGTGCGGAGGATCAGGTACT<br>R: TGATGGTGTCTCGAGTCTTTGA           | NM_011854                   |
| <b>Acyl-Coenzyme A oxidase 1, palmitoyl (Acox1)</b>                                            | F: TCCAGACTTCCAACATGAGGA<br>R: CTGGGCGTAGGTGCCAATTA             | NM_015729                   |
| <b>Adhesion G protein-coupled receptor E1<br/>(Adgre1 or F4/80)</b>                            | F: CTTTGGCTATGGGCTTCCAGTC<br>R: GCAAGGAGGACAGAGTTTATCGTG        | NM_010130                   |
| <b>Adiponectin (Adipoq)</b>                                                                    | F: CAGTGGATCTGACGACACCAA<br>R: CTGGGCAGGATTAAGAGGAACA           | NM_009605                   |
| <b>Carnitine palmitoyltransferase 2 (Cpt2)</b>                                                 | F: CAGCACAGCATCGTACCCA<br>R: TCCAATGCCGTTCTCAAAAT               | NM_009949                   |
| <b>Carnitine palmitoyltransferase 1a (Cpt1a)</b>                                               | F: CACCAACGGGCTCATCTTCTA<br>R: CAAAATGACCTAGCCTTCTATCGAA        | NM_013495                   |
| <b>CD68 antigen (Cd68)</b>                                                                     | F: CTCCCACAGGCAGCACAG<br>R: AATGATGAGAGGCAGCAAGAGG              | NM_001291058                |
| <b>Cell death-inducing DNA fragmentation factor,<br/>alpha subunit-like effector A (Cidea)</b> | F: TACTACCCGGTGTCCATTTCT<br>R: ATCACAACTGGCCTGGTTACG            | NM_007702                   |
| <b>Chemokine (C-C motif) ligand 2 (Ccl2)</b>                                                   | F: TTAACAACTGGATCGGAACCAA<br>R: GCATTAGCTTCAGATTTACGGGT         | NM_011333                   |
| <b>Chemokine (C-C motif) ligand 5 (Ccl5)</b>                                                   | F: GCTGCTTTGCCTACCTCTCC<br>R: TCGAGTGACAAACACGACTGC             | NM_013653                   |
| <b>Chemokine (C-C motif) ligand 6 (Ccl6)</b>                                                   | F: GGCTGGCCTCATACAAGAAATG<br>R: TGTGGCATAAGAGAAGCAGCA           | NM_009139                   |
| <b>Colony stimulating factor 1 receptor (Csf1r)</b>                                            | F: GCATACAGCATTACAACTGGACCTACC<br>R: CAGGACATCAGAGCCATTACAG     | NM_001037859                |
| <b>Cytochrome c oxidase subunit VIIa 1 (Cox7a1)</b>                                            | F: ATGAGGGCCCTACGGGTCTC<br>R: CATTGTGGCCTGGAAGAG                | NM_009944                   |
| <b>Glucokinase (Gck)</b>                                                                       | F: GAGATGGATGTGGTGGCAAT<br>R: ACCAGCTCCACATTCTGCAT              | NM_010292                   |
| <b>Glycerol kinase (Gyk)</b>                                                                   | F: AGGATGGACAGGCCAAAAA<br>R: GCCCGTGTTGCACAATAAGA               | NM_008194                   |
| <b>Glucose transporter type 4 (Slc2a4)</b>                                                     | F: TCATTGTCTGGCATGGGTTT<br>R: CGGCAATAGAAGGAAGACGTA             | NM_009204                   |
| <b>Glycogen synthase 2 (Gys2)</b>                                                              | F: CCAGCTTGACAAGTTCGACA<br>R: ATCAGGCTTCCTCTTCAGCA              | NM_145572                   |
| <b>Insulin receptor substrate 1 (Irs1)</b>                                                     | F: CTGGAGTATTATGAGAACGAGAAGAAGTGG<br>R: GTAGAGAGCCACCAGGTGCTTGT | NM_010570                   |
| <b>Integrin alpha X (Itgax)</b>                                                                | F: CTGGATAGCCTTTCTTCTGCTG<br>R: GCACACTGTGTCCGAACTCA            | NM_021334                   |
| <b>Interferon alpha 1 (Ifnα1)</b>                                                              | F: GGACTTTGGATTCCCGCAGGAGAAG<br>R: GCTGCATCAGACAGCCTTGACGGTC    | NM_010502                   |
| <b>Interferon beta 1 (Ifnβ1)</b>                                                               | F: CAGCTCCAAGAAAGGACGAAC<br>R: GGCAGTGTAACCTTCTGCAT             | NM_010510                   |
| <b>Interferon-induced protein with<br/>tetraatricopeptide repeats 1 (Ifit1)</b>                | F: CAAGGCAGGTTTCTGAGGAG<br>R: TGAAGCAGATTCTCCATGACC             | NM_008331                   |
| <b>Interferon-induced protein with<br/>tetraatricopeptide repeats 2 (Ifit2)</b>                | F: TCTGATTCTGAGGCCTTGCA<br>R: CTTGCTGACCTCCTCCATTCTC            | NM_008332                   |
| <b>Interferon-induced protein with<br/>tetraatricopeptide repeats 3 (Ifit3)</b>                | F: CCTACATAAAGCACCTAGATGGC<br>R: ATGTGATAGTAGATCCAGGCGT         | NM_010501                   |
| <b>Interferon Regulatory Factor 3 (Irf3)</b>                                                   | F: GGCTTGTGATGGTCAAGGTT<br>R: CATGTCCTCCACCAAGTCTT              | NM_016849                   |

Continued..

**Supplemental Table 6.. continued**

| <b>Gene Name<br/>(Symbol)</b>                                                               | <b>Primer sequence<br/>(5' – 3')</b>                    | <b>GenBank Acc.<br/>No.</b> |
|---------------------------------------------------------------------------------------------|---------------------------------------------------------|-----------------------------|
| <b>ISG15 ubiquitin-like modifier (Isg15)</b>                                                | F: CATCTATGAGGTCTTTCTGACGC<br>R: TTAGGCCATACTCCCCCAGC   | NM_015783                   |
| <b>Lipocalin 2 (Lcn2)</b>                                                                   | F: ATGCACAGGTATCCTCAGGT<br>R: TGGCGAACTGGTTGTAGTCC      | NM_008491                   |
| <b>Nitric oxide synthase 2, inducible (Nos2)</b>                                            | F: CCAAGCCCTCACCTACTTCC<br>R: CTCTGAGGGCTGACACAAGG      | NM_010927                   |
| <b>Peroxisome proliferator activated receptor<br/>alpha (Ppara)</b>                         | F: GTACCACTACGGAGTTCACGCAT<br>R: CGCCGAAAGAAGCCCTTAC    | NM_011144                   |
| <b>Peroxisome proliferative activated receptor,<br/>gamma, coactivator 1 alpha (Pgc-1α)</b> | F: GGACATGTGCAGCCAAGACTCT<br>R: CACTTCAATCCACCCAGAAAGCT | NM_008904                   |
| <b>Phosphoenolpyruvate carboxykinase<br/>(Pck1)</b>                                         | F: CTAATTGGCCATGATGAACC<br>R: CTTCACTGAGGTGCCAGGAG      | NM_011044                   |
| <b>PR domain containing 16 (Prdm16)</b>                                                     | F: TGACGGATACAGAGGTGTCAT<br>R: ACGCTACACGGATGTACTTGA    | NM_027504                   |
| <b>Radical S-adenosyl methionine domain<br/>containing 2 (Rsad2)</b>                        | F: AGCATTAGGGTGGCTAGATCC<br>R: CTGAGTGCTGTTCCCATCTTC    | NM_021384                   |
| <b>Ribosomal protein, large, P0 (Rplp0)/36B4</b>                                            | F: GAGGAATCAGATGAGGATATGGGA<br>R: AAGCAGGCTGACTTGGTTGC  | NM_007475                   |
| <b>Ribosomal protein S6 kinase polypeptide 1<br/>(Rps6kb1)</b>                              | F: GCTCTGAGGATGAGCTGGAG<br>R: CCATGCCAAGTTCATATGGTCC    | NM_001114334                |
| <b>Serine (or cysteine) peptidase inhibitor,<br/>clade A, member 3N (Serpina3n)</b>         | F: CAATGTCTGCGAACTGTACC<br>R: TTTGGGGTTGGCTATCTTGGC     | NM_009252                   |
| <b>Serine (or cysteine) peptidase inhibitor,<br/>clade A, member 3G (Serpina3g)</b>         | F: GTCACCCTGGGAAGGAACAC<br>R: GCAGTGCAGATGCTGAATGG      | NM_009251                   |
| <b>Src homology 2 domain-containing<br/>transforming protein C1 (Shc1)</b>                  | F: CCCCTCCTCCAGGACATGAA<br>R: AGCCCATGTACCGAACCAAG      | NM_001113331                |
| <b>Transmembrane protein 176A (Tmem176a)</b>                                                | F: TCCACAACCCACCCACATTG<br>R: CACCCAGAACCACACTCAGA      | NM_025326                   |
| <b>Transmembrane protein 176B (Tmem176b)</b>                                                | F: CAGTCCGCTCACATCAGCAT<br>R: TCACAAGCCCCAGCAATATC      | NM_023056                   |
| <b>Uncoupling protein 1 (mitochondrial, proton<br/>carrier) (Ucp1)</b>                      | F: AGGCTTCCAGTACCATTAGGT<br>R: CTGAGTGAGGCAAAGCTGATTT   | NM_009463                   |

Full Unedited Blots-1

Figure 1A IRF3

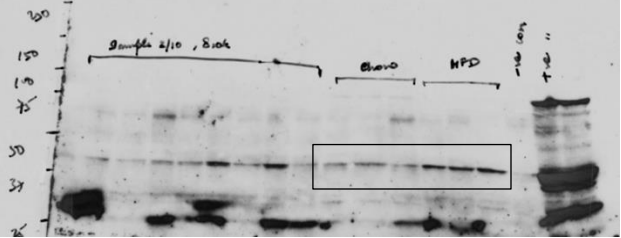

Figure 1A Caveolin-1

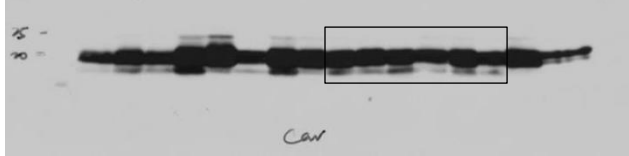

Figure 1A IRF3

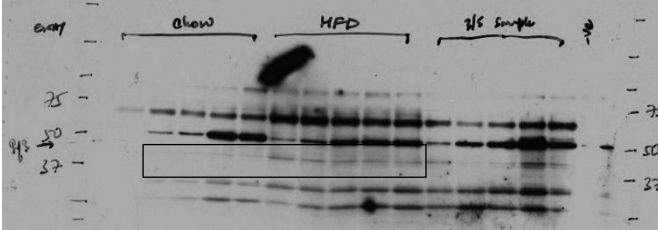

Figure 1A Caveolin-1

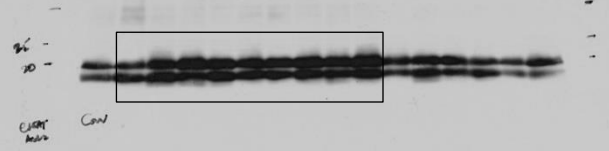

Figure 2B p-IRF3

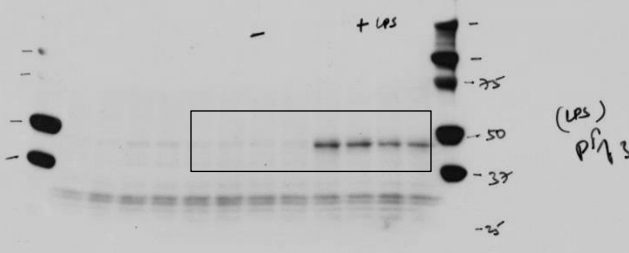

Figure 2B IRF3

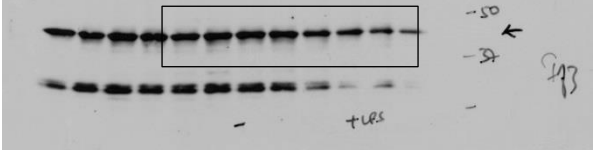

Figure 2E p-IRF3

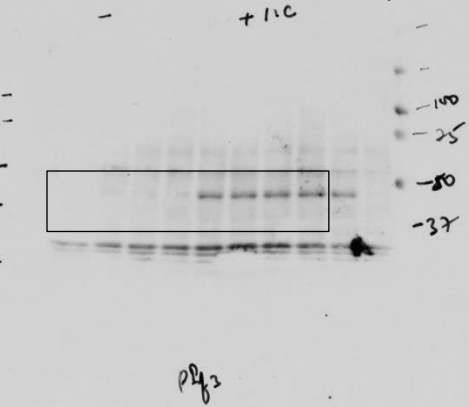

Figure 2E IRF3

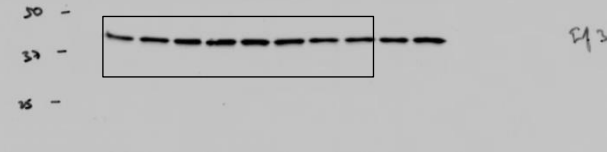

Supplemental Figure 2A

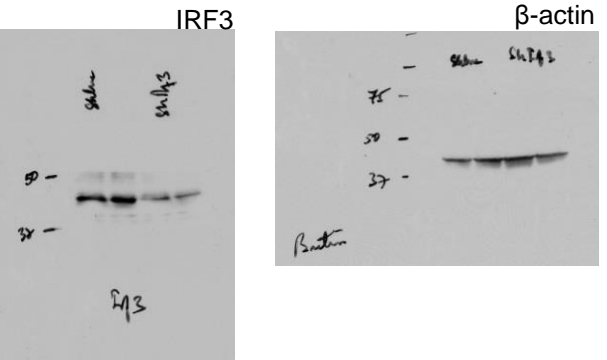



Full Unedited Blots-2

Supplemental Figure 2B p65

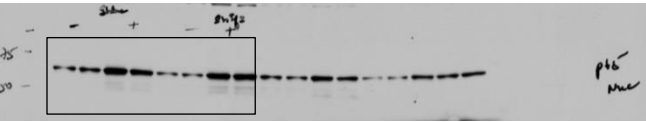

Supplemental Figure 2B p65

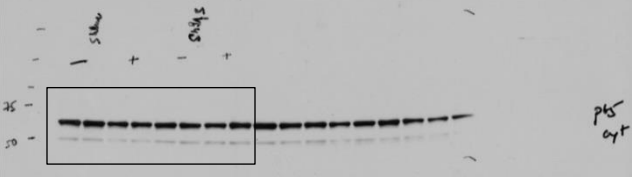

Supplemental Figure 2B p-p65

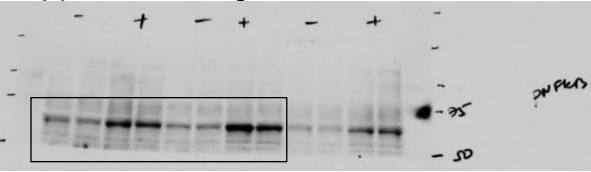

Supplemental Figure 2F p65

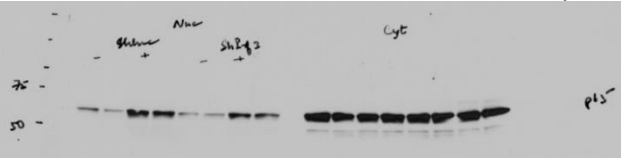

Supplemental Figure 2F p-p65

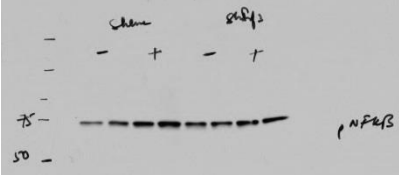

Supplemental Figure 3B IRF3

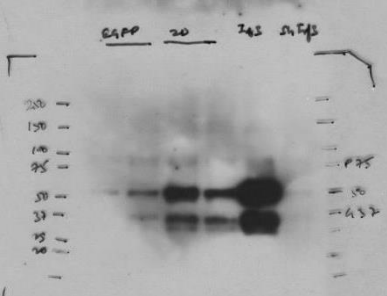

Supplemental Figure 3B  $\beta$ -actin

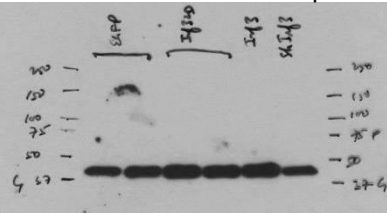

Supplemental Figure 3D p-AKT

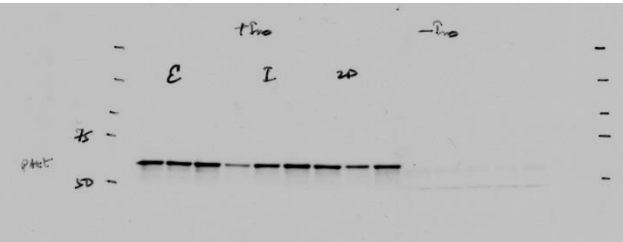

Supplemental Figure 3D AKT

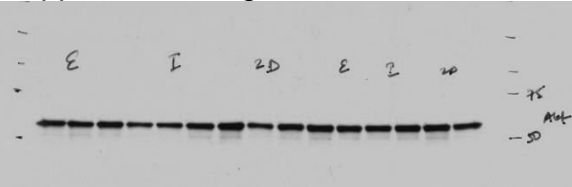

Supplemental Figure 3D p-p70S6K

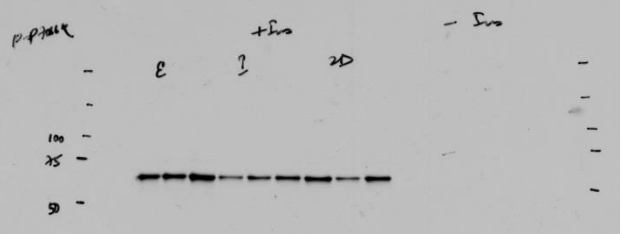

Supplemental Figure 3D p70S6K

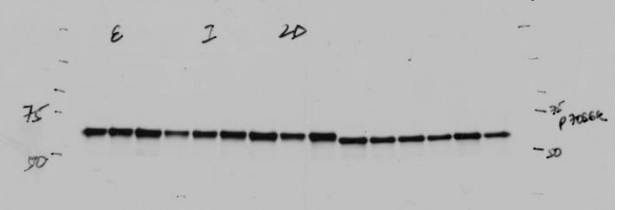

Supplemental Figure 3D GAPDH

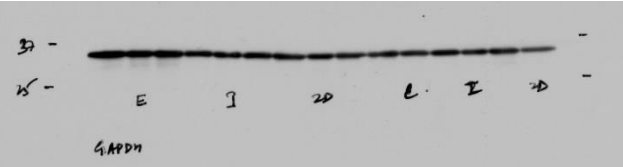

Full Unedited Blots-3

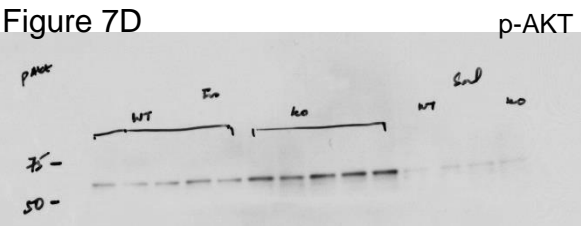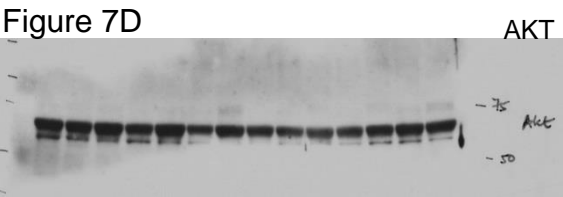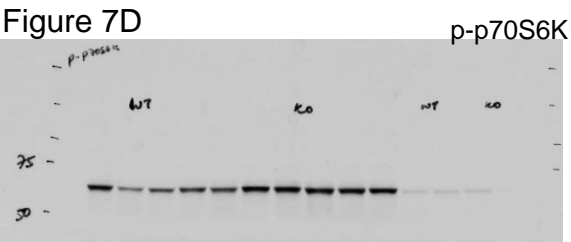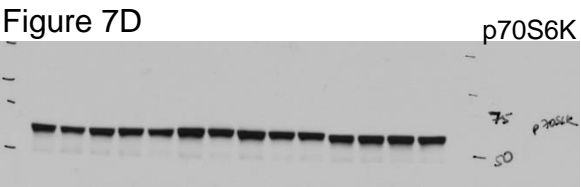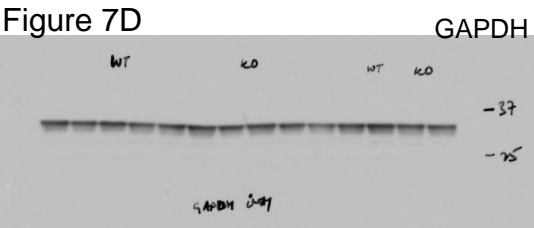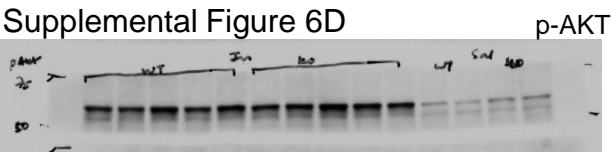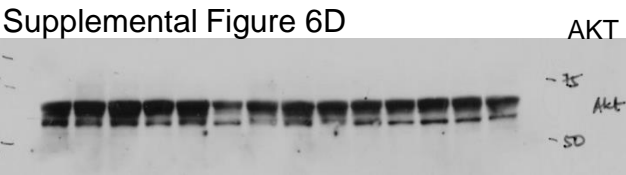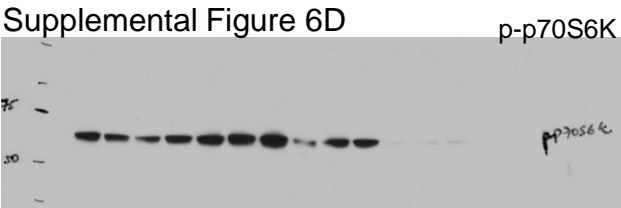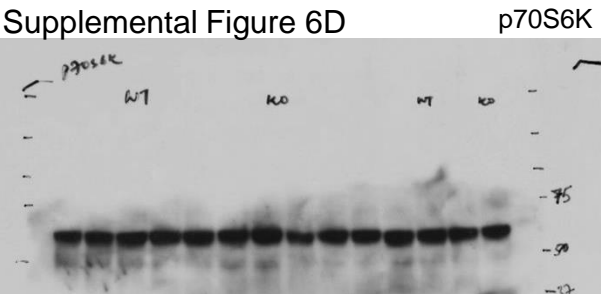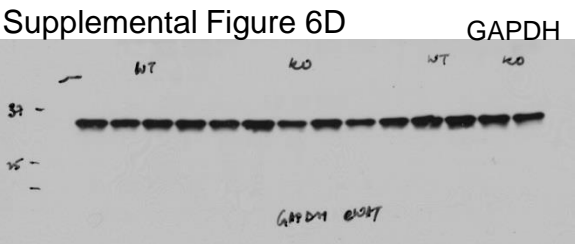

Full Unedited Blots-4

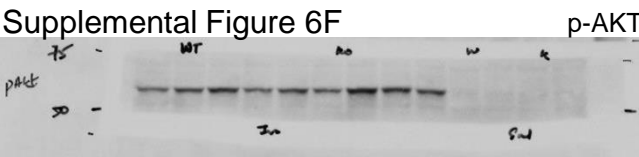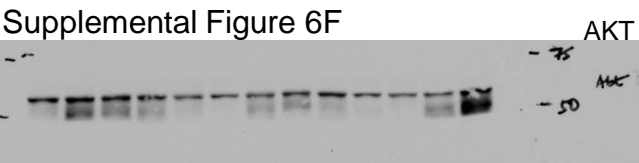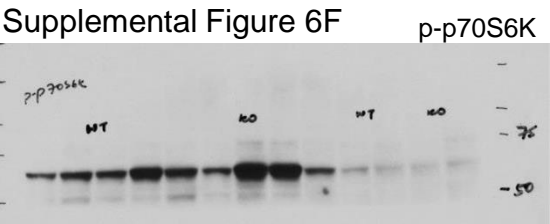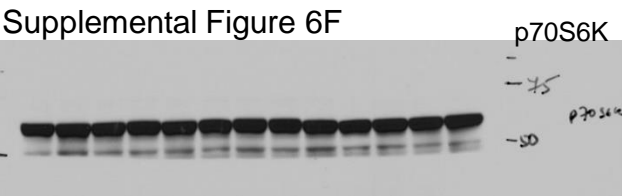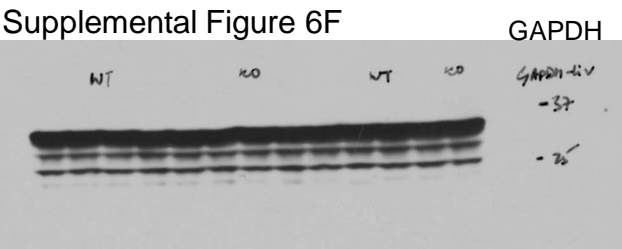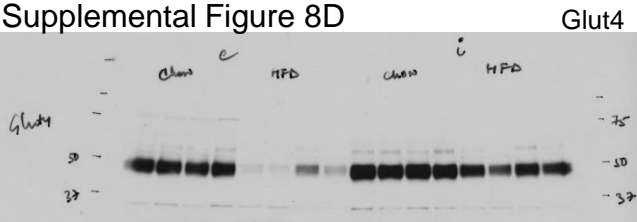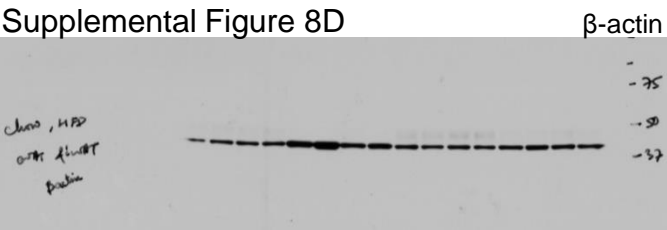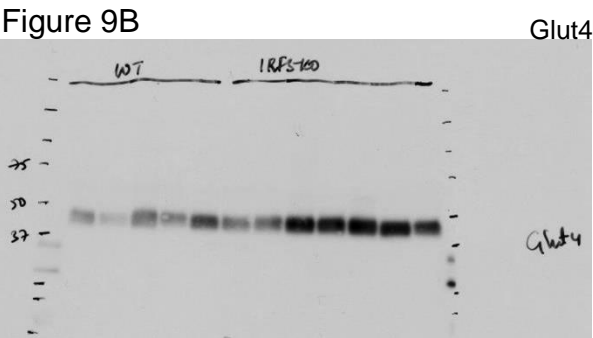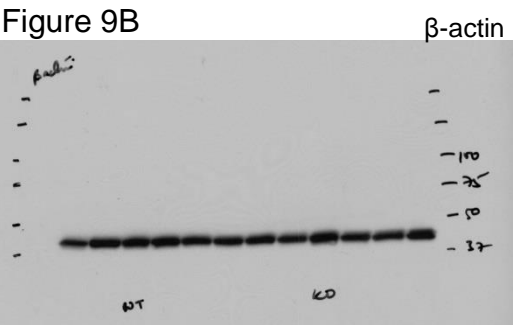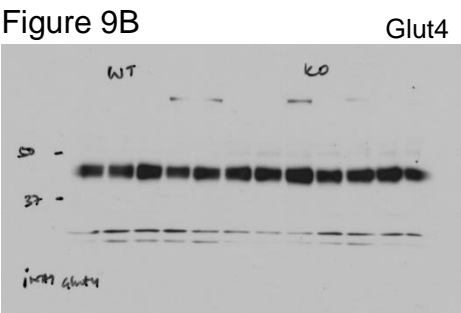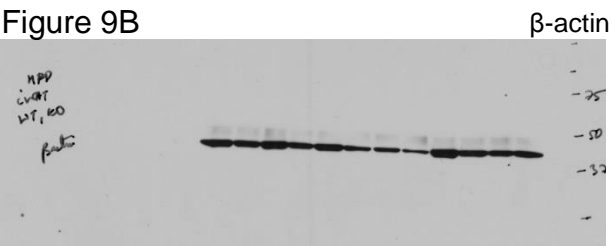

Supplement: sd1 [file 1]
